# Supplementary material for: Comparison of the spectrum and quantity of airborne bioparticles above morphologically typical populations of Ambrosia artemisiifolia and those with reduced male flower production
Source: Research Square preprint supplement (doi:10.21203/rs.3.rs-6914027/v1), 2025-07-10
Supplement: Supplementary file 1 [file a99dc6daf07f80b4eff35d83.docx]

**Comparison of the spectrum and quantity of airborne bioparticles above morphologically typical populations of *Ambrosia artemisiifolia* and those with reduced male flower production**

1Jana Ščevková*, 1Matúš Žilka, 2Peter Tóth, 1Eva Zahradníková, 1Michal Hrabovský

***Jana Ščevková** (author for correspondence)

address: Comenius University, Faculty of Natural Sciences, Department of Botany, Révová 39, 811 02 Bratislava, Slovakia

e-mail: [jana.scevkova@uniba.sk](mailto:jana.scevkova@uniba.sk)

tel: +421-2-90142095

ORCID iD https://orcid.org/0000-0002-3432-4105

**Table S1** Characteristics of the *Ambrosia* main pollen season (MPS) in Košice (the nearest permanent aerobiological monitoring station to the Veľký Horeš site) and Nitra (the nearest aerobiological monitoring station to the remaining analysed sites) in 2022.

| Characteristics | Košice | Nitra |
| --- | --- | --- |
| Start date | 16 Aug | 8 Aug |
| End date | 15 Sep | 25 Sep |
| Duration (days) | 31 | 49 |
| Seasonal Pollen Integral (pollen*day/m3) | 1,355 | 1,413 |
| Peak value (pollen/m3) | 191 | 158 |
| Peak date | 26 Aug | 7 Sep |
